# Supplementary material
Source: Atypon-hosted journal article supplement (https://archive.jpma.org.pk/PdfDownloadsupplements/224)
Supplement: 224 [file 224]

## Local recurrence of giant cell tumour of bone after intralesional treatment with and without adjuvant therapy, a single institution case series

Rana Dawood Ahmad Khan,<sup>1</sup> Usama Bin Saeed,<sup>2</sup> Muhammad Zain-ur-Rehman,<sup>3</sup> Muhammad Qasim Saeed,<sup>4</sup> Ajmal Yasin<sup>5</sup>

### Abstract

**Background:** Giant cell tumour (GCT) of bone is generally a benign tumour composed of mononuclear stromal cells and characteristic multinucleated giant cells that exhibit osteoclastic activity. It usually develops in long bones but can occur in unusual locations. The typical appearance is a lytic lesion with a well-defined but non-sclerotic margin that is eccentric in location, extends near the articular surface, and occurs in patients with closed physes.

**Objective:** The current study was planned to summarise our experiences with GCTB, and to evaluate individual effect of bone cement, high-speed burring and hydrogen peroxide (H<sub>2</sub>O<sub>2</sub>) on local recurrence. GCT can mimic or be mimicked by other benign or malignant lesions at both radiological evaluation and histological analysis. In the past, the mainstay of treatment was surgical, primarily consisting of curettage with cement placement, with recurrence rates of 15%-25%. Recurrence is suggested by development of progressive lucency at the cement-bone interface.

**Results:** Of the 21 patients who started the study, 4(19%) were lost to follow-up, and 17(81%) represented the final study sample. Of them, 16(94.11%) patients underwent the curettage procedure with adjuvant therapy and reconstruction with bone grafts taken from iliac crest. In 3(26.3%) patients, no adjuvant was used. Total of 6 (42.1%) patients had local recurrence and 3(50%) of them were those who were treated without any adjuvant; 2(33.3%) with phenol and 1(16.6%) with PMMA.

**Conclusion:** The results of the present study suggest that an "aggressive curettage" with the use of adjuvant reduces the recurrence rate in a disease whose aggressiveness is not easy to predict.

**Keywords:** Bone tumour, Giant cell tumour, Extremity, Surgery, Curettage, Resection, Wide excision. (JPMA 65: S-105 (Suppl. 3); 2015)

### Introduction

Giant cell tumour of bone (GCTB) is an intermediate, locally aggressive but rarely metastasising tumour, representing 5% of primary bone tumours and 20% of benign bone tumours.<sup>1</sup> It occurs mostly between the ages of 30-50 years and rarely arises in the immature skeleton. There is a slight predominance for female patients.<sup>1,2</sup> At presentation, 15%-20% of patients have a pathologic fracture due to substantial cortical destruction followed by relatively minor trauma. GCTB is typically seen solitary, mostly located in the meta-epiphyseal region of long bones (85%), but may also occur in the axial skeleton (10%) or occasionally in the small bones of hands and feet (5%).<sup>2,3</sup> At the latter location, so-called giant cell lesion of the small bones — a different entity — should be considered.<sup>4</sup> Approximately 1%-4% of otherwise conventional patients develop pulmonary metastases.<sup>3,5-9</sup> These metastases often have relatively indolent behaviour. Multifocal GCTB is rare, appearing either

simultaneously or metachronously. In these presentations, so-called brown tumours associated with hyperparathyroidism should be ruled out by blood biochemistry because they are histologically barely distinguishable from GCTBs. Malignant transformation has been described in less than 1% of all GCTBs and may be either primary (i.e., sarcomatous progression) or, more commonly, secondary (mostly radiation induced).<sup>1</sup>

The main problem in the management of GCTB is local recurrence after surgical treatment: 27%-65% after isolated curettage;<sup>2,3</sup> 12%-27% after curettage with adjuvants such as high-speed burr, phenol, liquid nitrogen, or polymethylmethacrylate (PMMA);<sup>2,10-12</sup> and 0%-12% after en bloc resection.<sup>2,13</sup> In clinical practice, the choice of surgical treatment depends mostly on the feasibility of curettage and local adjuvants versus resection, but also in part on the expected risk for local recurrence in each individual patient. Soft tissue extension, for example, is commonly present and increases the risk for local recurrence.<sup>14,15</sup> Pathological fractures are also common, and although this does not in itself increase recurrence risk, it may render curettage technically more difficult. In general, the aim for joint preservation is justified, considering the benign but

<sup>1-3,5</sup>Department of Orthopedic Surgery, Allied Hospital, Punjab Medical College Faisalabad, Pakistan, <sup>4</sup>Graduate Student, Clinical Research Department of Experimental Medicine, McGill University, Montreal, Canada.

**Correspondence:** Rana Dawood Ahmad Khan. Email: doc\_dawood@yahoo.com

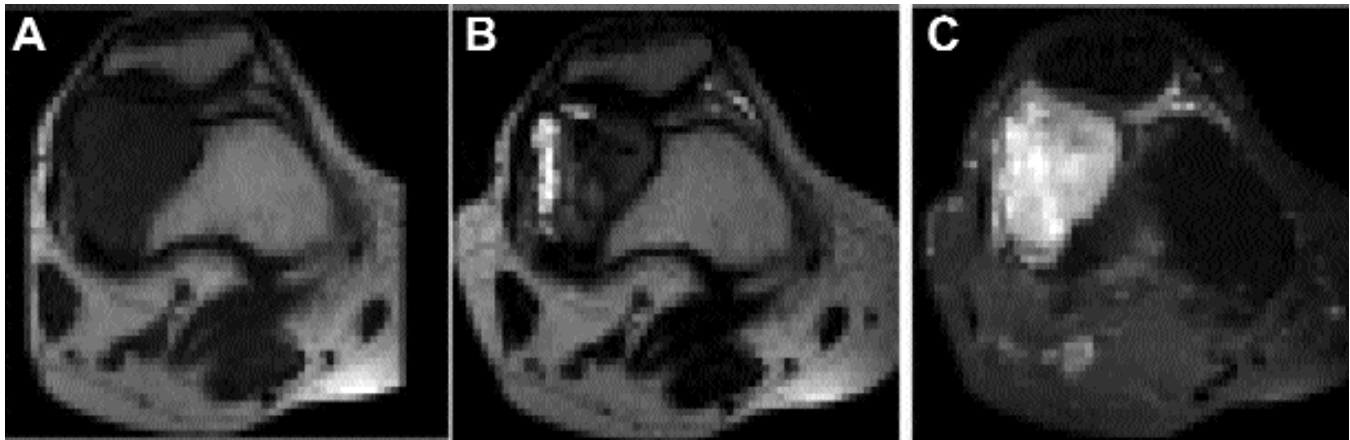

**Figure-1:** Different radiological modalities in the diagnosis of giant cell tumour of bone. (A): Plain radiograph shows a lytic lesion with extensive cortical destruction and a pathological fracture in the distal radius. (B-D): T1- and T2-weighted magnetic resonance imaging (MRI) shows low signal intensity through hemosiderin depositions and high signal intensity through secondary cystic changes. (C): T1-weighted MRI with fat suppression after intravenous gadolinium administration demonstrates marked, relatively homogeneous enhancement.

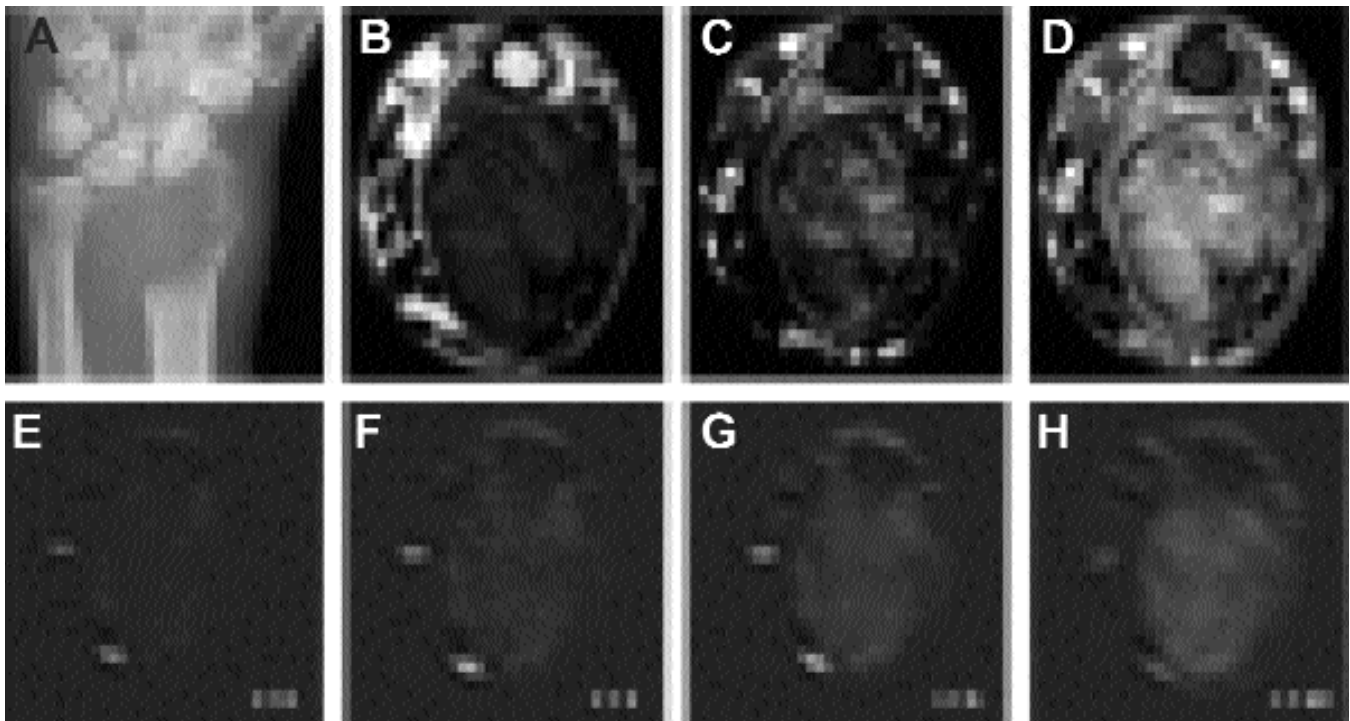

**Figure-2:** Different radiological modalities in the diagnosis of giant cell tumour of bone. (A): Plain radiograph shows a lytic lesion with extensive cortical destruction and a pathological fracture in the distal radius. (B-D): T1- and T2-weighted magnetic resonance imaging (MRI) shows inhomogeneous low to high signal intensity and marked enhancement after gadolinium administration. (E-H): Dynamic contrast-enhanced MRI (DCE-MRI) shows homogeneous enhancement within 6 seconds after gadolinium administration. DCE-MRI can provide functional information on tumour angiogenesis and permeability but will not be part of standard imaging protocols in many centres.

locally aggressive nature, young patient population, and significant complications including need for revision surgery after resection and reconstruction with tumour prostheses.<sup>16-19</sup>

The current study was planned to summarise our

experiences with GCTB, and to evaluate individual effect of bone cement, high-speed burring and hydrogen peroxide (H<sub>2</sub>O<sub>2</sub>) on local recurrence.

### Materials and Methods

The descriptive case series was conducted at the

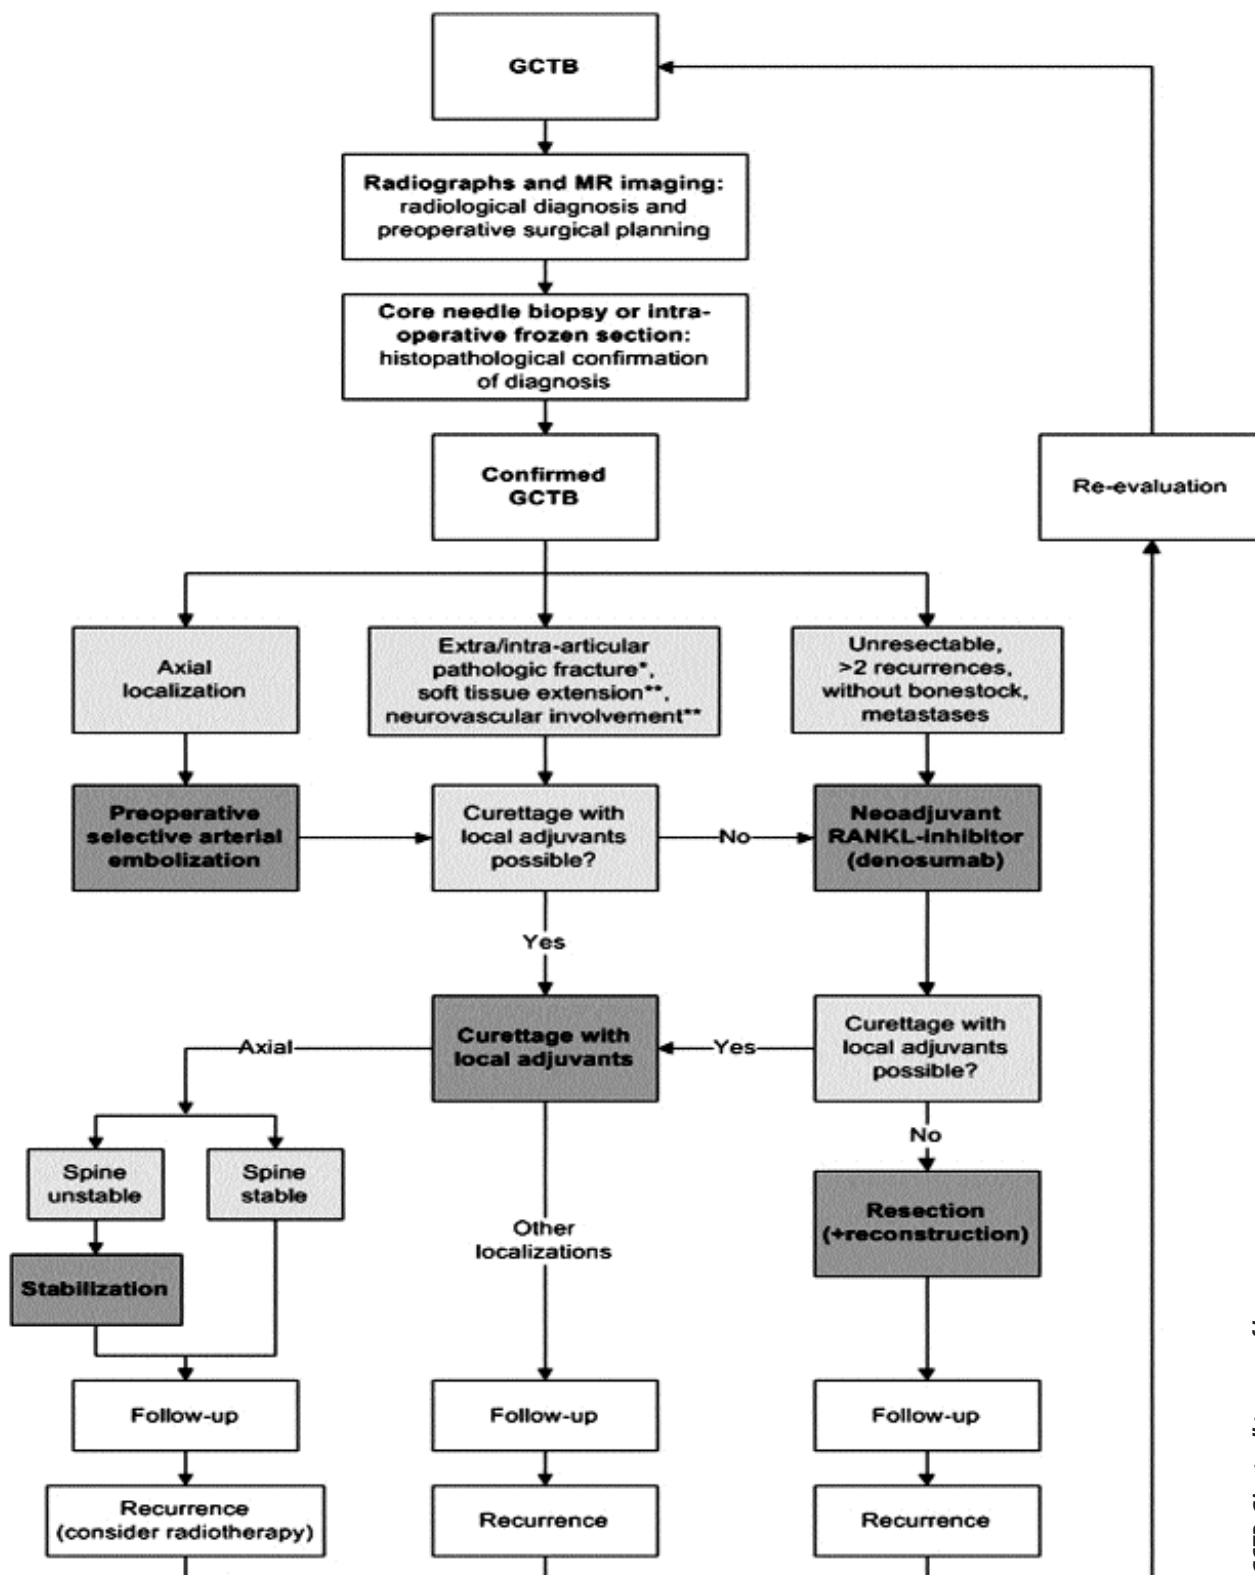

GCTB: Giant cell tumour of bone  
MR: Magnetic resonance.

**Figure-3:** Multidisciplinary treatment recommendations for giant cell tumour of bone (GCTB).\*, With extra-articular pathologic fractures, preoperative fracture healing may be delayed, whereas immediate surgery is required with intra-articular pathological fractures.\*\*, Caution is warranted with local adjuvants (e.g., phenol, alcohol, liquid nitrogen) in case of involvement of soft tissues or neurovascular structures because it may induce (severe) necrosis.

**Table-1:** Adjuvant therapies for GCT.

| Local chemical and physical adjuvants |                                                                                                                                                                                                                    |
|---------------------------------------|--------------------------------------------------------------------------------------------------------------------------------------------------------------------------------------------------------------------|
| Cryosurgery (liquid N)                | With the use of liquid nitrogen, the tumor is subjected to a freeze/thaw cycle in an attempt to cause cellular necrosis.                                                                                           |
| Alcohols                              | An organic compound used for antiseptic purposes. Anhydrous alcohols have been reported to be a safe adjuvant for the treatment of GCT.                                                                            |
| Phenol                                | A chemical which has antiseptic properties and removes microscopic tumor residuals                                                                                                                                 |
| Hydrogen peroxide                     | Oxidizing effervescent which is used to clean and removal tumor cell residues                                                                                                                                      |
| Zinc chloride                         | A chemical compound, which causes cell necrosis and is used to inhibit recurrence of GCT                                                                                                                           |
| Argon beam coagulation                | Cryotherapy that causes thermal necrosis of GCT and is used to lower the local recurrence                                                                                                                          |
| Mechanism-based drugs                 |                                                                                                                                                                                                                    |
| Denosumab                             | Human monoclonal antibody which targets RANKL, thereby inhibiting the formation and function of giant osteoclast-like cells of the tumor                                                                           |
| Bisphosphonates                       | A series of drugs that strongly attaches to hydroxyapatite of the bone and are then ingested by resorptive cells, leading to apoptosis of these cells. Bisphosphonates also have activity against cancerous cells. |
| IFN $\alpha$                          | A protein produced by leukocytes and is involved in immune response. IFN $\alpha$ is an antiangiogenic inhibitor, which obstructs angiogenesis and tumor growth by targeting growth factors (e.g., bFGF, VEGF).    |

GCT: Giant cell tumour

RANKL: Receptor activator of nuclear factor kappa-B ligand

IFN $\alpha$ : interferon alpha

bFGF: Basic fibroblast growth factor

VEGF: Vascular endothelial growth factor.

Department of Orthopaedics, Punjab Medical College, Faisalabad, Pakistan, and affiliated hospitals from July 2011 to June 2014. Patients meeting the inclusion criteria were admitted through the outpatient department (OPD) and those lost to follow-up were excluded. Non-probability but purposive sampling technique was used. Risks and benefits were discussed. We analysed the differences in local recurrence rates, functional results, and complications between wide excision and curettage with adjuvant therapy in management of the patients diagnosed with primary lesions after follow-up.

The data collected consisted of clinical notes, operative notes, radiographic images, pathological reports, as well as gross and microscopic imaging. They were asked to sign an informed consent form for surgery and allow the use of data for research purposes. The lesions were graded according to Campanacci et al.<sup>6</sup> as Grade I, Grade II, or Grade III. Any pathological fractures were noted. Intra-compartmental or extra-compartmental tumour growth was identified on the basis of preoperative imaging studies, including computed tomography (CT) and magnetic resonance imaging (MRI) and on the basis of intraoperative findings. The compartmental extension was graded T1 or T2 according to the system of Enneking

et al.<sup>12,13</sup> and Wolf and Enneking.<sup>14</sup> All surgical specimens were reviewed by a consultant pathologist specialising in bone and soft tissue pathology and histologically classified as benign GCT.

For intralesional procedures, a wide cortical window was created to observe the tumour cavity. The tumour tissue was removed with a curette. The borders of the tumour cavity then were cleared away with a high speed burr. The tumour cavity was inspected with a dental mirror or an endoscope to verify the removal of all tumour tissue. Further, 89 per cent phenol was applied in the borders of the cavity with cotton-tipped applicators and then neutralised with alcohol in 16 patients. Finally, the tumour cavity was packed carefully with autologous and/or allogenic bone grafts and PMMA. Procedures in which polymethylmethacrylate packing was combined with bone grafting were subsumed into PMMA treatment groups.

For follow-up, patients were contacted via phone and serial radiographs of primary site and chest were taken every 3-4 months for the first 2 years and every 6 months for the next year and annually thereafter.

Data was analysed via SPSS 19 to find percentages and

frequencies of study variables. Descriptive statistics were used to calculate mean and standard deviations.

**Results**

Of the 21 patients who started the study, 4(19%) were lost to follow-up, and 17(81%) represented the final study sample. Of them, 16(94.11%) patients underwent the

curettage procedure with adjuvant therapy and reconstruction with bone grafts taken from iliac crest. In 3(26.3%) patients, no adjuvant was used. Total of 6 (42.1%) patients had local recurrence and 3(50%) of them were

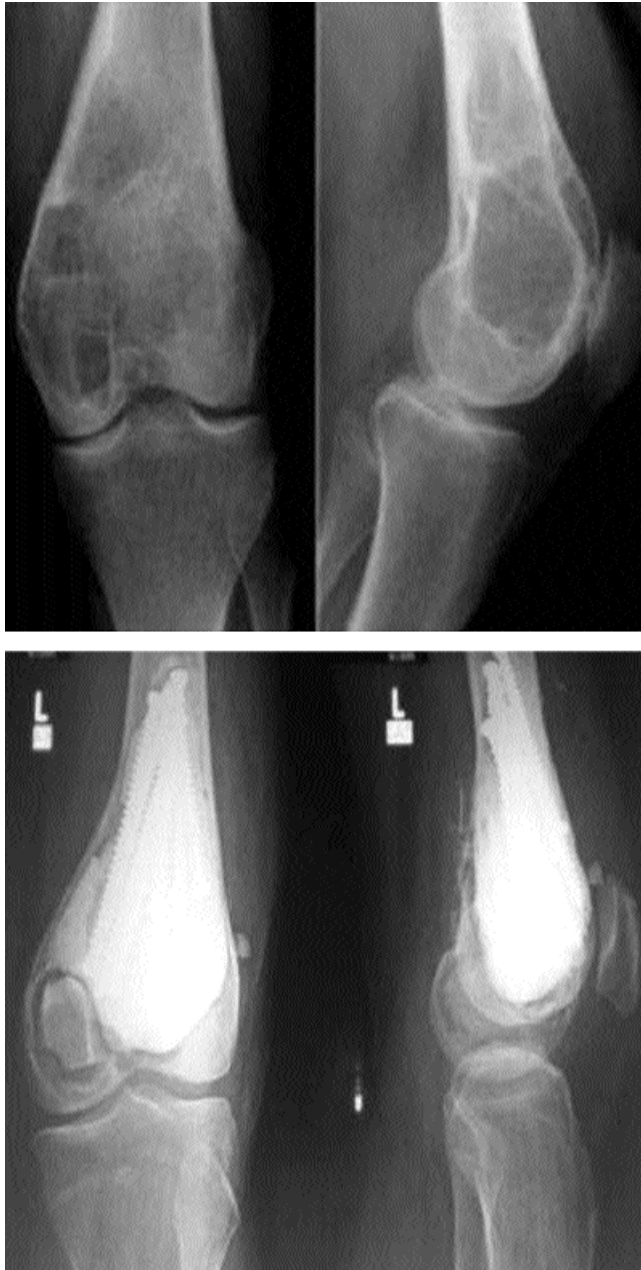

**Figure-3:** Radiological appearance of giant cell tumour of bone (GCTB) of distal femur in one of our patients. (A, B): Radiographs demonstrating an eccentric, sharply demarcated lytic lesion in the distal femur metaphysis extending to the epiphysis without tumor mineralisation. And Post-Op radiograph of the same patient treated with bone cement and a bone graft augmented with screws.

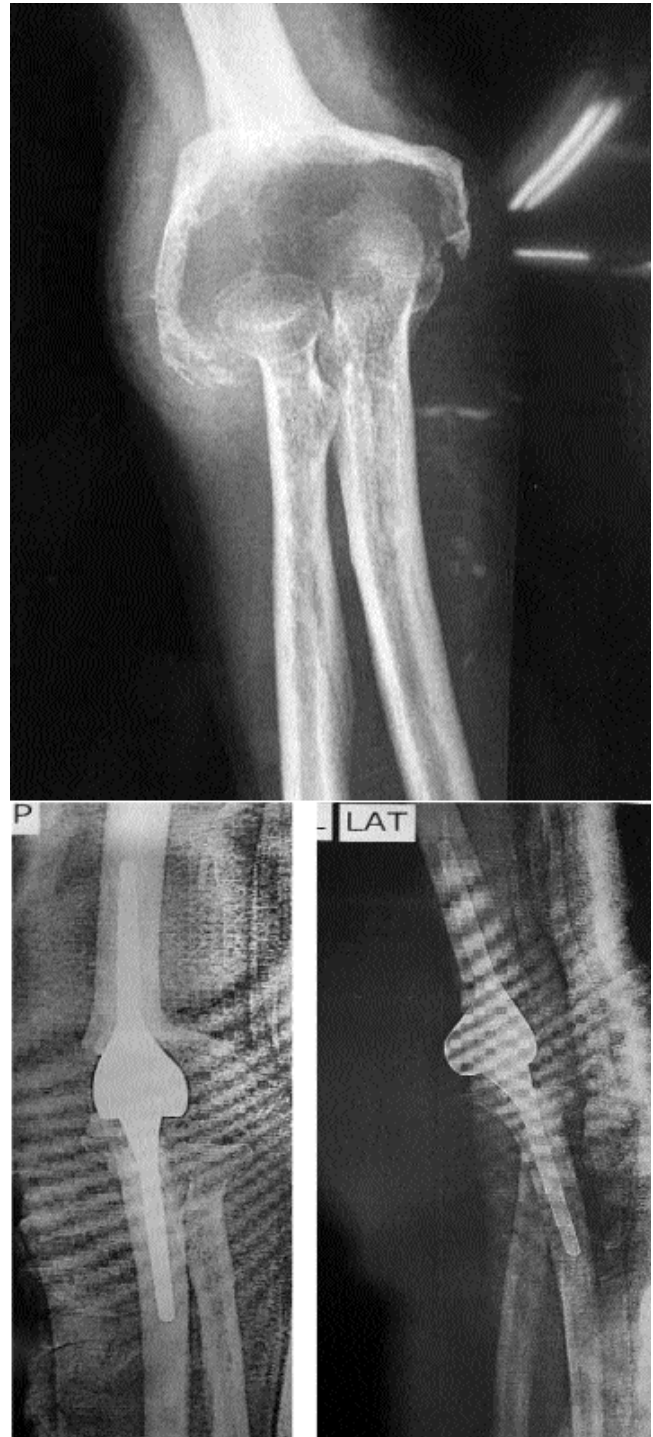

**Figure-4:** Another patient with Giant Cell Tumour of Distal Humerus that was treated with wide excision and Elbow Arthroplasty afterwards.

**Table-2:** Descriptive patient demographics and treatment data in our study.

| Parameter                        | Mean   | SD      |
|----------------------------------|--------|---------|
| Patient age at diagnosis (years) | 35.4   | 15.8    |
| Time to recurrence (months)      | 16.4   | 12.3    |
| Followup (months)                | 27.9   | 34.1    |
|                                  | Number | Percent |
| <b>Gender</b>                    |        |         |
| Male                             | 08     | 47      |
| Female                           | 09     | 52.9    |
| <b>Location</b>                  |        |         |
| Distal femur                     | 9      | 52.9    |
| Distal tibia                     | 2      | 11.7    |
| Proximal tibia                   | 2      | 11.7    |
| Distal humerus                   | 3      | 17.6    |
| Proximal humerus                 | 1      | 5.88    |
| <b>Grade (Campanacci)</b>        |        |         |
| Grade I                          | 5      | 29.4    |
| Grade II                         | 4      | 23.5    |
| Grade III                        | 8      | 47.0    |
| <b>Tumor extension</b>           |        |         |
| T1                               | 9      | 52.9    |
| T2                               | 8      | 47.1    |
| Pathologic fracture              | 13     | 76.4    |
| <b>Treatment</b>                 |        |         |
| Wide resection                   | 01     | 5.88    |
| Intralesional surgery            | 16     | 94.11   |
| <b>Adjuvants</b>                 |        |         |
| No Adjuvant                      | 03     | 18.75   |
| Bone grafting + phenol           | 04     | 25      |
| PMMA+ Bone graft                 | 6      | 37.5    |
| PMMA+Phenol                      | 3      | 18.75   |
| Recurrences-total                | 06     | 37.5    |
| Recurrences-bone                 | 5      | 83.3    |
| Soft tissue implantations        | 4      | 3.4     |

those who were treated without any adjuvant; 2(33.3%) with phenol and 1(16.6%) with PMMA (Table-2). Using the Musculoskeletal Tumour Society system to evaluate average function,<sup>17</sup> the results were 25.56 points for the wide excision group and 25.64 points for the curettage group, respectively.

Intralesional procedures were the most common surgical treatment and of the 16(94%) patients treated with intralesional surgery and PMMA void filling, 7(43.7%) received additional local phenol and alcohol treatment; 3(43%) with PMMA and 4(57%) with phenol alone. Six (37.5%) patients were treated solely with PMMA and no additional adjuvants. Wide resections were performed in 1(5.88%) patient (Figure-3, 4),

Reconstructions after wide resections included

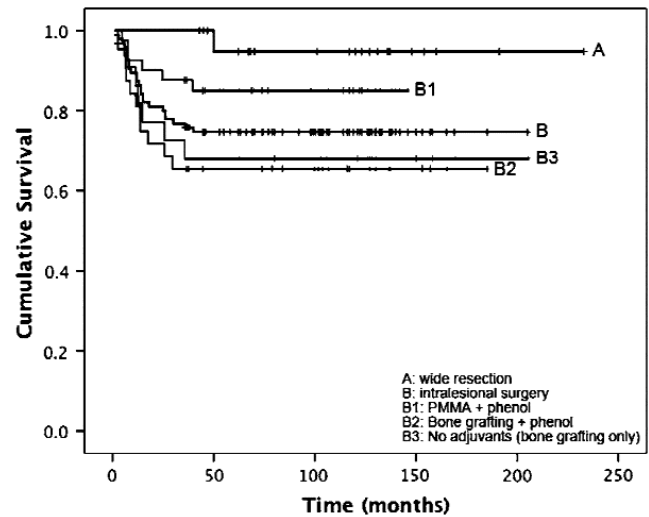**Kaplan -Meier survival analysis.<sup>18</sup>**

**Figure-5:** Recurrence-free survival for patients with primary giant cell tumour (GCT) treated with wide resection (A) and intralesional surgery (B) is shown. Treatment subgroups for patients were intralesional surgery included the use of polymethylmethacrylate (PMMA) and phenol (B1), the use of bone grafting and phenol (B2), and intralesional surgery without adjuvants (B3). The estimated cumulative recurrence free survival (95% confidence interval) rates were 0.947 (0.847-0.999) for Group A, 0.747 (0.659-0.835) for Group B, 0.851 (0.741-0.961) for Group B1, 0.656 (0.491-0.821) for Group B2, and 0.682 (0.488-0.876) Group B3.

arthroplasties 1(5.88%), (Figure-4) The mean interval between surgery and recurrence was  $16.3 \pm 12.4$  months (range: 4-36 months) (Figure-5).

## Discussion

Giant cell tumour of bone (GCTB) is a benign but locally aggressive tumour that usually involves the end of long bone. Its histogenesis remains unclear. It is characterised by a proliferation of mononuclear stromal cells and the presence of many multinucleated giant cells with homogenous distribution. The name giant cell tumour was suggested by Cooper and Travers<sup>19</sup> in 1818. Virchow<sup>19,20</sup> suggested a malignant potential in 1846. Ne'laton,<sup>20</sup> a French doctor, was the first to recognise the similarities of the multinucleated giant cell with osteoclasts in 1860. In 1912, Bloodgood<sup>21</sup> reported on the benign nature of GCT. Most of current knowledge of this specific bone tumour has come from Jaffe et al.<sup>22</sup>

GCT has a significant incidence, accounting for 20% of all benign bone tumours and 5% of all bone tumours.<sup>23</sup> Higher incidence has been reported for Chinese population, in which it can be up to 20% of all bone tumours.<sup>24</sup> Although some series show a slight female predominance,<sup>25</sup> but most support that there is no gender predilection in GCT. GCTB most frequently occurs



**Table-4:** Kaplan-Meier survival analysis of recurrence free survival 10 years after surgery.

| Surgical treatment           | Recurrence-free survival | Standard error | Mean recurrence-free survival (months) | 95% confidence interval | p (versus wide resection) | p (versus PMMA+phenol) |
|------------------------------|--------------------------|----------------|----------------------------------------|-------------------------|---------------------------|------------------------|
| Wide resection               | 0.955                    | 0.051          | 116                                    | 109–123                 | –                         | –                      |
| Intralesional surgery        | 0.747                    | 0.045          | 93                                     | 84–103                  | 0.036                     | –                      |
| PMMA+phenol                  | 0.854                    | 0.056          | 105                                    | 93–116                  | 0.209                     | –                      |
| Bone grafting+phenol         | 0.656                    | 0.084          | 83                                     | 66–101                  | 0.009                     | 0.044                  |
| No adjuvants (bone grafting) | 0.682                    | 0.099          | 87                                     | 67–107                  | 0.018                     | 0.107                  |

in young adults between 20 and 40 years of age.<sup>26</sup> Occurrence before epiphyseal plate closure is exceptional.<sup>27</sup> GCT can be seen in patients over 50 years old. Though less frequent, this disease needs to be included in the differential diagnosis process of a lytic bone lesion.<sup>28</sup>

Intralesional curettage has been established as the preferred treatment for most GCTs. Wide resection is reserved for tumours with extensive destruction, impossible joint salvage, and when expendable bones like fibular head or distal ulna are affected.<sup>14,16,23,27,28</sup> We analysed the recurrence-free survival after treatment of GCT with an emphasis on the impact of surgical approach, adjuvant therapy, tumour presentation and demographic factors on the risk of recurrence.

Similar to previous reports,<sup>1,3,6,15,22,28</sup> we found that wide resection was associated with a lower risk of recurrence than intralesional surgery. When intralesional procedures are performed, local adjuvants (PMMA, phenol, H<sub>2</sub>O<sub>2</sub>, and cryotherapy) have been reported to improve tumour control.<sup>1,3,5,11,28,29</sup> Campanacci et al. showed a rate of recurrence of 27% out of all intralesional procedures, 8% in marginal excisions and 0% in wide excisions, and 90% of recurrences occurred in the first three years after surgery.<sup>29</sup> We found that PMMA's use decreased the risk of local recurrence. Similar risk reductions have been observed by others,<sup>1,3,22</sup> and have been attributed to thermal and toxic effects on tumour cells.<sup>33</sup> Additionally, PMMA may decrease the risk of collapse and allow for more aggressive tumour removal as a result of its mechanical properties. Considering the importance of thorough tumour removal, this capacity may overshadow the effects of heat-mediated tumour effects; a suggestion that was also made by Gher et al.<sup>33</sup> Similar results were reported by Klenke et al.<sup>34</sup> in their retrospective study of 46 patients. The use of PMMA with intralesional curettage lowers the recurrence rate from the average of 32% to 14%. The recurrence rates seen for wide resection are near 5-6%, but they entail considerable loss of function. In another series, Klenke et al. reported on the recurrence

rates of GCT in 118 patients treated with wide resection and intralesional curettage and the rates are 5% and 25%, respectively. However, they suggested the use of curettage with PMMA, since this procedure lowers the recurrence rate and it provides equivalent tumour control compared to resection.<sup>36,40</sup> Phenol is a commonly used adjuvant for GCT treatment. Phenol induces tumour necrosis<sup>24,36,37,41</sup> with few adverse effects. However, tissue penetration is poor and limits tumour necrosis to superficial cell layers.<sup>34</sup> Balke et al. found a negligible necrotising effect of phenol and discounted it as an adjuvant after curettage of bone tumours.<sup>2,19,21,33</sup> Others have also reported little effect of phenol on recurrence.<sup>1,35-38</sup> However, Durr et al. did report decreased local recurrence with the use of phenol.<sup>39</sup> We did not find any effect of adjuvant phenol treatment on GCT recurrence. Age at diagnosis independently predicted recurrence regardless of the status of the disease and the aggressiveness of the chosen treatment: recurrence rate decreased as the patient's age increased. The greater risk of young patients having recurrence has been reported [40] and may be associated with increased bone turnover in young people.<sup>21,34,40,41</sup> This hypothesis is supported by studies showing inhibition of bone turnover with bisphosphonates reducing the risk of recurrence.<sup>7,9,17,43</sup> Other demographic and disease-related variables (gender, location, tumour grade, soft tissue extension, and pathologic fracture) had no influence on local recurrence in our patients. Previous studies have also shown that gender, location, and tumour grade did not influence recurrence.<sup>1,3,43</sup> The prognostic relevance of soft tissue expansion and pathological fractures is controversial.<sup>1,3,15,22,31,38,40,43</sup> Becker et al. found that the prevalence of soft tissue extension influenced the risk of local recurrence<sup>41</sup> and O'Donnell et al. reported that pathological fractures were associated with an increased recurrence rate.<sup>43</sup>

The aggressiveness of the treatment should be considered when interpreting the correlation of soft tissue expansion or pathological fractures and local recurrence. In tumours with and without pathological

fractures, wide resections were performed in 47% and 14%, respectively. Thus, patients with pathological fractures more commonly received resections. In this retrospective study, this may underestimate the risk of recurrence in patients with pathological fractures. The rate of pulmonary metastases in our study patients was 0%, similar to previous studies reporting ranges from 0% to 4%.<sup>3,4,8,10,15,20,30,39,42,44</sup> Although GCT is classified as a benign lesion [44], but few patients develop progressive lung metastases with poor outcomes.<sup>2,6,44</sup> It is difficult to quantify the real morbidity (physical and emotional) of patients who experience recurrence and require repeat surgery. Based on the results of this study, we recommend intralesional surgery for treating most GCTs; the selection of bone graft versus PMMA remains individualised. Because young age is a risk factor for local recurrence, we favour the use of PMMA in young patients as the best way to minimise recurrence and preserve the native joint. Similarly, when little bone stock remains or for patients with questionable compliance for a limited weight-bearing rehabilitation, methylmethacrylate is favoured for its immediate stability.

## Conclusion

The combination of adjuncts (PMMA, burring, H<sub>2</sub>O<sub>2</sub>) reduces the likelihood of recurrence compared to curettage alone and therefore should be recommended as the standard treatment. If the tumour reaches close to the articulating surface, a strut/cancellous bone graft can be performed without risking a higher recurrence rate. Use of PMMA as an adjuvant significantly reduces the recurrence rate following intralesional treatment of benign GCT, and it appears to be the therapy of choice for primary as well as recurrent Giant Cell Tumour of Bone.

## References

- Errani C, Ruggieri P, Asenzio MA, Toscano A, Colangeli S, Rimondi E, et al. Giant cell tumor of the extremity: a review of 349 cases from a single institution. *Cancer Treat Rev* 2010; 36: 1-7.
- Balke M, Schremper L, Gebert C, Ahrens H, Streitbueger A, Koehler G, et al. Giant cell tumor of bone: treatment and outcome of 214 cases. *J Cancer Res Clin Oncol* 2008; 134: 969-78.
- Saiz P, Virkus W, Piasecki P, Templeton A, Shott S, Gitelis S. Results of giant cell tumor of bone treated with intralesional excision. *Clin Orthop Relat Res* 2004; 424: 221-6.
- Turcotte RE, Wunder JS, Isler MH, Bell RS, Schachar N, Masri BA, et al. Giant cell tumor of long bone: a Canadian Sarcoma Group study. *Clin Orthop Relat Res* 2002; 397: 248-58.
- Niu X, Zhang Q, Hao L, Ding Y, Li Y, Xu H, et al. Giant cell tumor of the extremity: retrospective analysis of 621 Chinese patients from one institution. *J Bone Joint Surg Am* 2012; 94: 461-7.
- Turcotte RE. Giant cell tumor of bone. *Orthop Clin North Am* 2006; 37: 35-51.
- Deheshi BM, Jaffer SN, Griffin AM, Ferguson PC, Bell RS, Wunder JS. Joint salvage for pathologic fracture of giant cell tumor of the lower extremity. *Clin Orthop Relat Res* 2007; 459: 96-104.
- Fourney DR, Rhines LD, Hentschel SJ, Skibber JM, Wolinsky JP, Weber KL, et al. En bloc resection of primary sacral tumors: classification of surgical approaches and outcome. *J Neurosurg Spine* 2005; 3: 111-22.
- Lackman RD, Crawford EA, King JJ, Ogilvie CM. Conservative treatment of Campanacci grade III proximal humerus giant cell tumors. *Clin Orthop Relat Res* 2009; 467: 1355-9.
- Roeder F, Timke C, Zwicker F, Thieke C, Bischof M, Debus J, et al. Intensity modulated radiotherapy (IMRT) in benign giant cell tumors - a single institution case series and a short review of the literature. *Radiat Oncol* 2010; 5:18. doi: 10.1186/1748-717X-5-18.
- Ravi V, Wang WL, Lewis VO. Treatment of tenosynovial giant cell tumor and pigmented villonodular synovitis. *Curr Opin Oncol* 2011; 23: 361-6.
- Vult von Steyern F, Bauer HC, Trovik C, Kivioja A, Bergh P, Holmberg Jörgensen P, et al. Treatment of local recurrences of giant cell tumour in long bones after curettage and cementing. A Scandinavian Sarcoma Group study. *J Bone Joint Surg Br* 2006; 88: 531-5.
- Mendenhall WM, Zlotecki RA, Scarborough MT, Gibbs CP, Mendenhall NP. Giant cell tumor of bone. *Am J Clin Oncol* 2006; 29: 96-9.
- Prosser GH, Baloch KG, Tillman RM, Carter SR, Grimer RJ. Does curettage without adjuvant therapy provide low recurrence rates in giant-cell tumors of bone? *Clin Orthop Relat Res* 2005; 435: 211-8.
- Thangaraj R, Grimer RJ, Carter SR, Stirling AJ, Spilsbury J, Spooner D. Giant cell tumour of the sacrum: a suggested algorithm for treatment. *Eur Spine J* 2010; 19: 1189-94.
- van der Heijden L, Dijkstra PD, van de Sande MA, Kroep JR, Nout RA, van Rijswijk CS, et al. The clinical approach toward giant cell tumor of bone. *Oncologist* 2014; 19: 550-61.
- Jawad MU, Scully SP. In brief: classifications in brief: Enneking classification: benign and malignant tumors of the musculoskeletal system. *Clin Orthop Relat Res* 2010; 468: 2000-2.
- Thomas D, Henshaw R, Skubitz K, Chawla S, Staddon A, Blay JY, et al. Denosumab in patients with giant-cell tumour of bone: an open-label, phase 2 study. *Lancet Oncol* 2010; 11: 275-80.
- Balke M, Campanacci L, Gebert C, Picci P, Gibbons M, Taylor R, et al. Bisphosphonate treatment of aggressive primary, recurrent and metastatic Giant Cell Tumour of Bone. *BMC Cancer* 2010; 10: 462. doi: 10.1186/1471-2407-10-462.
- Chakarun CJ, Forrester DM, Gottsegen CJ, Patel DB, White EA, Matcuk GR Jr. Giant cell tumor of bone: review, mimics, and new developments in treatment. *Radiographics* 2013; 33: 197-211.
- Balke M, Neumann A, Suzhai K, Agelopoulos K, August C, Gosheger G, et al. A short-term in vivo model for giant cell tumor of bone. *BMC Cancer* 2011; 11: 241. doi: 10.1186/1471-2407-11-241.
- Gaston CL, Bhumbra R, Watanuki M, Abudu AT, Carter SR, Jeys LM, et al. Does the addition of cement improve the rate of local recurrence after curettage of giant cell tumours in bone? *J Bone Joint Surg Br* 2011; 93: 1665-9.
- Janas A, Osica P. Central giant cell granuloma located in the maxilla in a 8-year old boy. *Dev Period Med.* 2015; 20(2): 189-192. PMID: 26384122
- Wada T, Kaya M, Nagoya S, Kawaguchi S, Isu K, Yamashita T, et al. Complications associated with bone cementing for the treatment of giant cell tumors of bone. *J Orthop Sci* 2002; 7: 194-8.
- Abdelrahman M, Bassiony AA, Shalaby H, Assal MK. Cryosurgery and impaction subchondral bone graft for the treatment of giant cell tumor around the knee. *HSS J* 2009; 5: 123-8.
- Gortzak Y, Kandel R, Deheshi B, Werier J, Turcotte RE, Ferguson PC, et al. The efficacy of chemical adjuvants on giant-cell tumour of bone. An in vitro study. *J Bone Joint Surg Br* 2010; 92: 1475-9.
- Lin WH, Lan TY, Chen CY, Wu K, Yang RS. Similar local control between phenol- and ethanol-treated giant cell tumors of bone. *Clin Orthop Relat Res* 2011; 469: 3200-8.

28. Veth R, Schreuder B, van Beem H, Pruszczynski M, de Rooy J. Cryosurgery in aggressive, benign, and low-grade malignant bone tumours. *Lancet Oncol* 2005; 6: 25-34.
  29. Yanagawa T, Watanabe H, Shinozaki T, Takagishi K. Curettage of benign bone tumors without grafts gives sufficient bone strength. *Acta Orthop* 2009; 80: 9-13.
  30. Suzuki Y, Nishida Y, Yamada Y, Tsukushi S, Sugiura H, Nakashima H, et al. Re-operation results in osteoarthritic change of knee joints in patients with giant cell tumor of bone. *Knee* 2007; 14: 369-74.
  31. Fraquet N, Faizon G, Rosset P, Phillipeau J, Waast D, Gouin F. Long bones giant cells tumors: treatment by curettage and cavity filling cementation. *Orthop Traumatol Surg Res* 2009; 95: 402-6.
  32. van der Heijden L, Dijkstra PD, Campanacci DA, Gibbons CL, van de Sande MA. Giant cell tumor with pathologic fracture: should we curette or resect? *Clin Orthop Relat Res* 2013; 471: 820-9.
  33. Balke M, Ahrens H, Streitbueger A, Koehler G, Winkelmann W, Gosheger G, et al. Treatment options for recurrent giant cell tumors of bone. *J Cancer Res Clin Oncol* 2009; 135: 149-58.
  34. Klenke FM, Wenger DE, Inwards CY, Rose PS, Sim FH. Recurrent giant cell tumor of long bones: analysis of surgical management. *Clin Orthop Relat Res* 2011; 469: 1181-7.
  35. van der Heijden L, van de Sande MA, Heineken AC, Fiocco M, Nelissen RG, Dijkstra PD. Mid-term outcome after curettage with polymethylmethacrylate for giant cell tumor around the knee: higher risk of radiographic osteoarthritis? *J Bone Joint Surg Am* 2013; 95: e159. doi: 10.2106/JBJS.M.00066.
  36. Mankin HJ, Hornicek FJ. Treatment of giant cell tumors with allograft transplants: a 30-year study. *Clin Orthop Relat Res* 2005; 439: 144-50.
  37. Shi W, Indelicato DJ, Reith J, Smith KB, Morris CG, Scarborough MT, et al. Radiotherapy in the management of giant cell tumor of bone. *Am J Clin Oncol* 2013; 36: 505-8.
  38. Muheremu A, Niu X. Pulmonary metastasis of giant cell tumor of bones. *World J Surg Oncol* 2014; 12: 261. doi: 10.1186/1477-7819-12-261.
  39. Kim Y, Nizami S, Goto H, Lee FY. Modern interpretation of giant cell tumor of bone: predominantly osteoclastogenic stromal tumor. *Clin Orthop Surg* 2012; 4: 107-16.
  40. López-Pousa A, Martín Broto J, Garrido T, Vázquez J. Giant cell tumour of bone: new treatments in development. *Clin Transl Oncol* 2015; 17: 419-30.
  41. Arbeitsgemeinschaft Knochentumoren, Becker WT, Dohle J, Bernd L, Braun A, Cserhati M, et al. Local recurrence of giant cell tumor of bone after intralesional treatment with and without adjuvant therapy. *J Bone Joint Surg Am* 2008; 90: 1060-7.
  42. Ward WG Sr, Li G 3rd. Customized treatment algorithm for giant cell tumor of bone: report of a series. *Clin Orthop Relat Res* 2002; 397: 259-70.
  43. O'Donnell RJ, Springfield DS, Motwani HK, Ready JE, Gebhardt MC, Mankin HJ. Recurrence of giant-cell tumors of the long bones after curettage and packing with cement. *J Bone Joint Surg Am* 1994; 76: 1827-33.
  44. Werner M. Giant cell tumour of bone: morphological, biological and histogenetical aspects. *Int Orthop* 2006; 30: 484-9.
-
